# Supplementary material for: Regret after Gender-affirmation Surgery: A Systematic Review and Meta-analysis of Prevalence
Source: PubMed Central journal article supplement — Plast Reconstr Surg Glob Open. 2021 Mar 19;9(3):e3477. doi: 10.1097/GOX.0000000000003477 (PMC8099405; doi:10.1097/gox.0000000000003477), 2021-03-19
Supplement: gox-9-e3477-s002.pdf [file gox-9-e3477-s002.pdf]

**SDC 2.** National Institute of Health (NIH) quality assessment tool.

| <b>STUDY NAME AND YEAR</b> | <b>GOOD</b> | <b>FAIR</b> | <b>POOR</b> |
|----------------------------|-------------|-------------|-------------|
| Blanchard et al,1989       |             |             | 1           |
| Cohen-Kettenis et al, 1997 |             |             | 1           |
| De Cuypere et al,2006      |             | 1           |             |
| Jiang et al,2018           |             |             | 1           |
| Kuiper et al, 1998         |             |             | 1           |
| Lawrence, 2003             |             | 1           |             |
| Lobato et al, 2006         |             | 1           |             |
| Oslo-Kennedy et al, 2018   |             | 1           |             |
| Smith et al, 2001          |             | 1           |             |
| Van DeGrift et al, 2018    |             | 1           |             |
| Weipjes et al, 2018        |             | 1           |             |
| Judge et al, 2014          |             | 1           |             |
| Vujovic et al, 2009        |             |             | 1           |
| Weyers et al, 2009         | 1           |             |             |
| Nelson et al, 2009         | 1           |             |             |
| Poudrier et al, 2019       |             | 1           |             |
| Laden et al, 1998          |             | 1           |             |
| Bouman et al, 1988         |             | 1           |             |
| Johansson et al, 2010      | 1           |             |             |
| Kreger et al, 2001         |             |             | 1           |
| Papadopulos et al, 2017    | 1           |             |             |
| Pfafflin,1993              |             | 1           |             |
| Rehman et al, 1999         | 1           |             |             |
| Song et al, 2010           |             |             | 1           |
| Zavlin et al, 2018         |             | 1           |             |
| Garcia et al, 2004         |             |             | 1           |
| Imbimbo et al, 2009        |             |             | 1           |
| <b>TOTAL 27</b>            | <b>5</b>    | <b>13</b>   | <b>9</b>    |
